# Supplementary material
Source: publisher figshare collection journal article supplement (https://gsapubs.figshare.com/articles/dataset/_/13020632)

## **Supplementary Material: 3D Model of a hand specimen of the Rasthof Formation bearing lonestones and granule clusters.**

### *Introduction*

As supplementary material, we present a 3 D model of a hand specimen of the Rasthof Formation in .fbx format. It can be viewed in the free Windows 3D Viewer app, and imported to various other software platforms e.g. Agisoft Metashape. The model was constructed from 119 photos taken by Christoph Kettler in May 2020. The photographs were aligned, a dense point cloud generated, textured, and a 3 D model created following the standard photogrammetry workflow in Agisoft Metashape. The model was then exported to .fbx format for viewing on multiple different platforms.

### *Description*

The model shows a dololaminite hand specimen of the Rasthof Formation, collected from Rasthof Farm, and which contains abundant granule to pebble-sized clasts. Many of the clasts show “impact structures” beneath them, and are overlain by unformed, draping laminae, permitting them to be interpreted as ice rafted debris (dropstones). Whilst the majority of these occur as isolated clasts, there are also several examples of granule clusters, which can be interpreted as “till pellets” (Tomkins et al., 2008). The specimen shows some limited evidence for karst weathering on some sides, but several surfaces are remarkably fresh. A screenshot of the model, as viewed in Microsoft 3D Viewer and with a scale bar, is shown below.

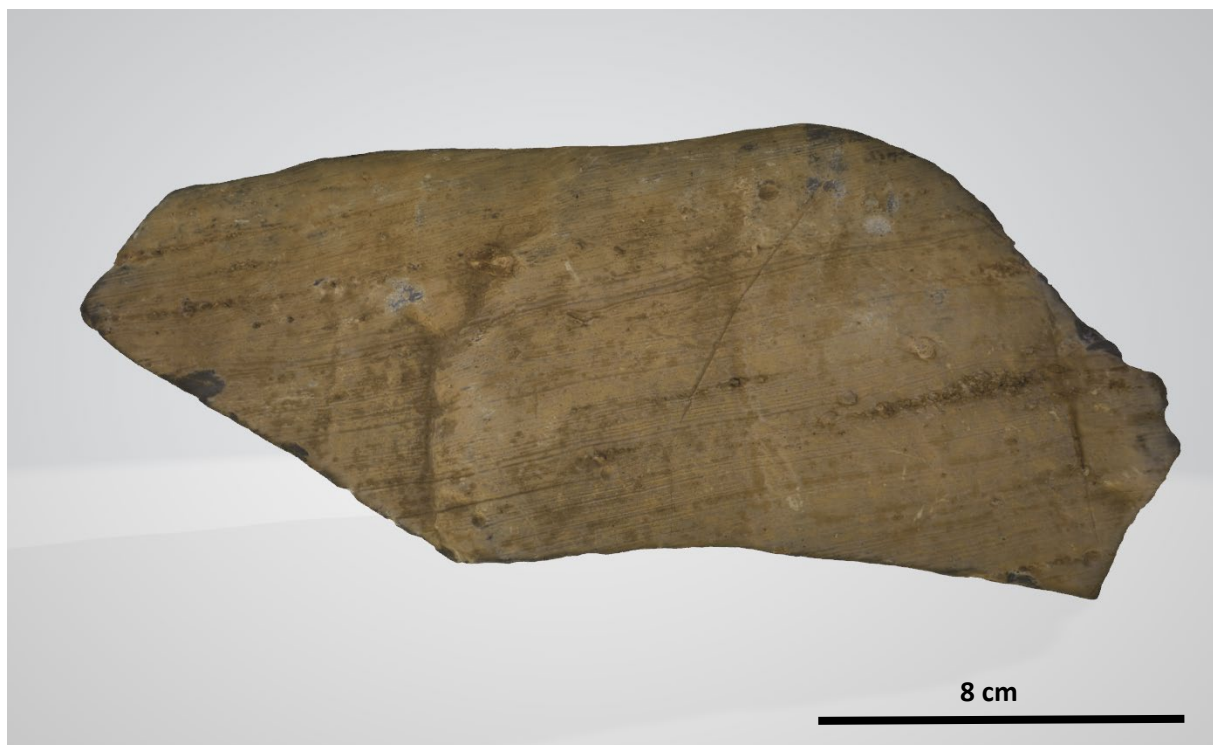

Supplement: Supplementary file 1 [file 1]
